# Supplementary material for: Adrenal SGLT1 or SGLT2 as predictors of atherosclerosis under chronic stress based on a computer algorithm
Source: PeerJ journal article supplement (doi:10.7717/peerj.15647), 2023-08-30
Supplement: RawDataCode_83281.zip [file RawDataCode_83281.zip]

## Sheet: xiangguan
group	SGLT1	SGLT2	Edema	Glycogen	Reticular fiber
1	15.934	14.682	19.681	15.796	12.726
2	16.563	15.036	21.029	16.911	14.257
3	17.392	15.827	21.208	21.67	14.425
4	17.538	16.371	26.959	21.926	14.561
5	17.748	16.372	27.249	22.073	14.998
6	17.768	16.891	29.819	22.261	15.002
7	17.831	17.499	30.439	22.296	15.985
8	18.119	18.089	33.637	22.663	17.101
9	18.308	18.17	36.247	25.314	17.451
10	19.552	18.496	36.303	26.635	18.381
11	20.028	18.618	39.479	27.059	19.566
12	20.598	18.666	40.266	28.334	19.593
13	20.638	18.846	54.494	28.418	21.612
14	20.775	19.036	61.658	31.313	22.844
15	21.035	19.255	66.028	35.03	24.367
16	18.078	19.152	31.96	13.081	10.109
17	18.877	20.112	34.159	15.196	11.49
18	19.587	20.296	36.059	27.282	11.702
19	21.18	21.207	36.215	27.978	14.415
20	21.474	21.299	38.706	28.145	15.261
21	21.671	21.374	38.986	29.383	15.4
22	21.724	21.549	39.372	29.433	15.655
23	21.85	21.689	41.055	29.735	16.312
24	22.161	22.099	43.878	31.931	16.524
25	22.221	23.068	44.477	34.771	17.837
26	22.352	23.228	45.123	35.091	17.978
27	22.387	23.438	46.145	36.05	18.67
28	22.988	23.446	48.013	36.247	20.49
29	23.431	23.601	49.588	36.753	22.757
30	23.524	23.714	49.615	42.767	23.778
31	20.185	18.414	16.957	13.821	11.176
32	20.383	18.415	17.369	14.106	13.214
33	20.694	18.519	20.846	14.731	17.172
34	20.923	18.619	23.165	17.773	19.615
35	21.014	18.677	30.28	20.801	19.762
36	21.084	18.782	31.904	21.89	19.812
37	21.187	18.824	33.352	23.888	20.337
38	21.357	18.977	40.393	26.081	20.879
39	21.609	19.134	42.366	26.227	21.165
40	21.847	19.669	45.662	26.655	21.212
41	21.923	20	47.15	29.958	23.087
42	21.95	20.418	48.095	32.908	23.439
43	22.071	20.787	49.633	33.936	23.88
44	22.111	21.931	50.013	35.682	23.939
45	22.169	24.474	54.118	36.901	29.045
46	24.195	23.633	25.402	16.935	15.684
47	24.301	23.804	27.062	21.941	15.687
48	24.495	23.901	33.067	22.678	17.361
49	24.978	24.076	33.519	27.048	17.568
50	25.107	24.19	34.116	27.716	17.804
51	25.816	24.58	47.777	31.153	17.922
52	26.002	24.939	61.286	33.55	23.112
53	26.08	25.014	61.308	37.019	23.484
54	26.301	25.155	65.981	37.604	23.776
55	27.113	26.794	66.475	41.208	25.316
56	27.865	27.705	66.723	42.197	25.316
57	28.722	28.585	67.35	43.074	25.618
58	29.653	29.465	67.986	43.116	28.429
59	30.27	29.98	71.125	45.179	30.054
60	31.346	32.016	78.468	48.058	30.288
