# Supplementary figures and images for: Adrenal SGLT1 or SGLT2 as predictors of atherosclerosis under chronic stress based on a computer algorithm
Source: PeerJ journal article supplement (doi:10.7717/peerj.15647), 2023-08-30

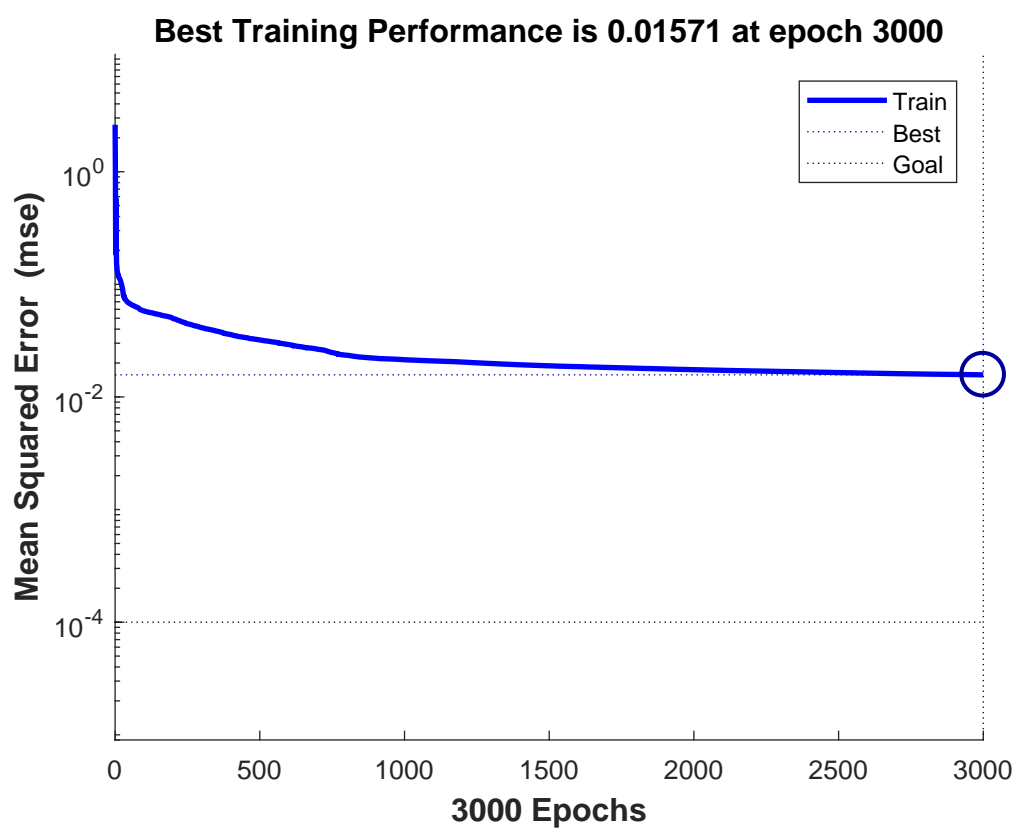

Supplement: RawDataCode_83281.zip [file RawDataCode_83281.zip]

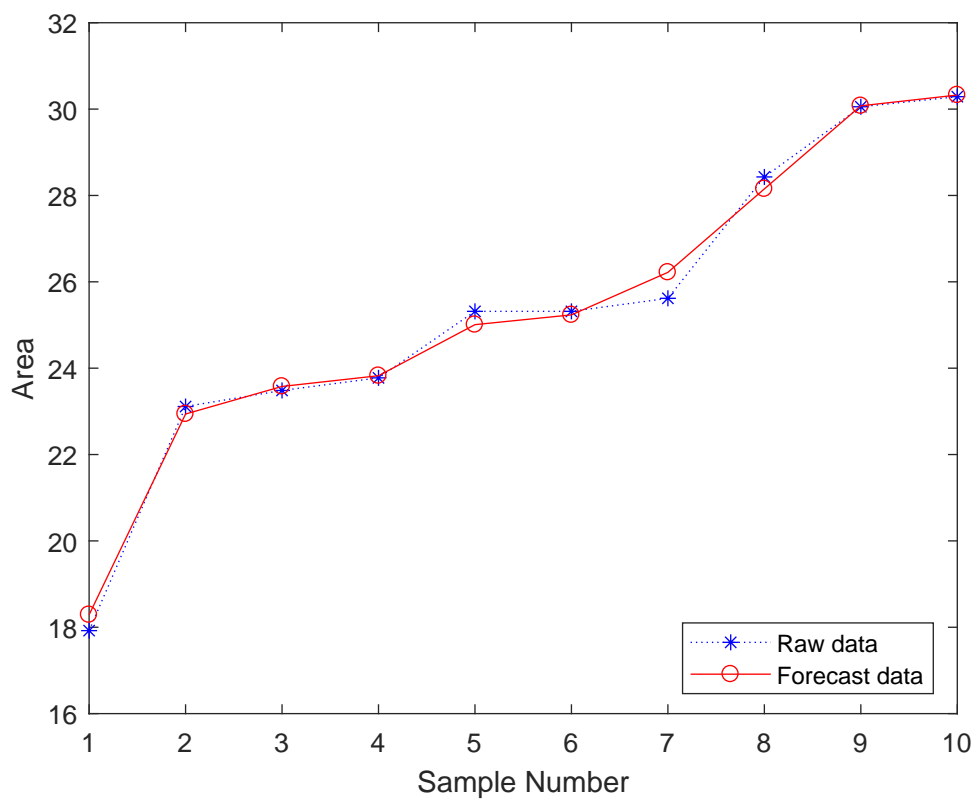

Supplement: RawDataCode_83281.zip [file RawDataCode_83281.zip]

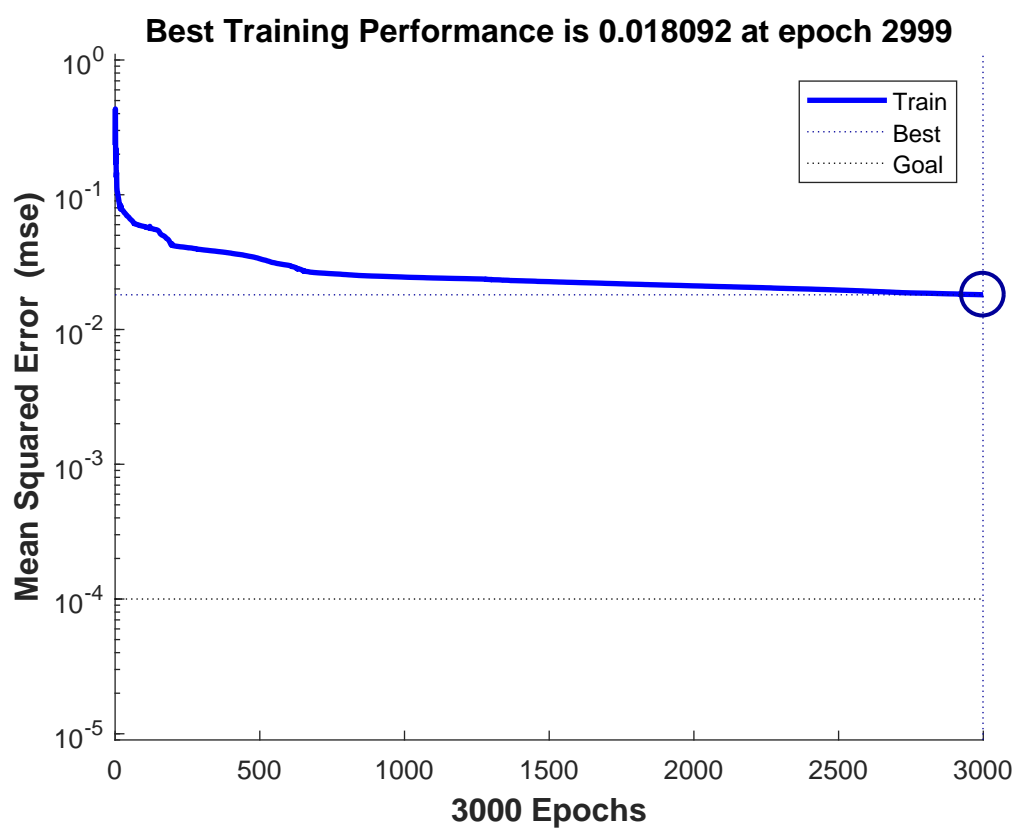

Supplement: RawDataCode_83281.zip [file RawDataCode_83281.zip]

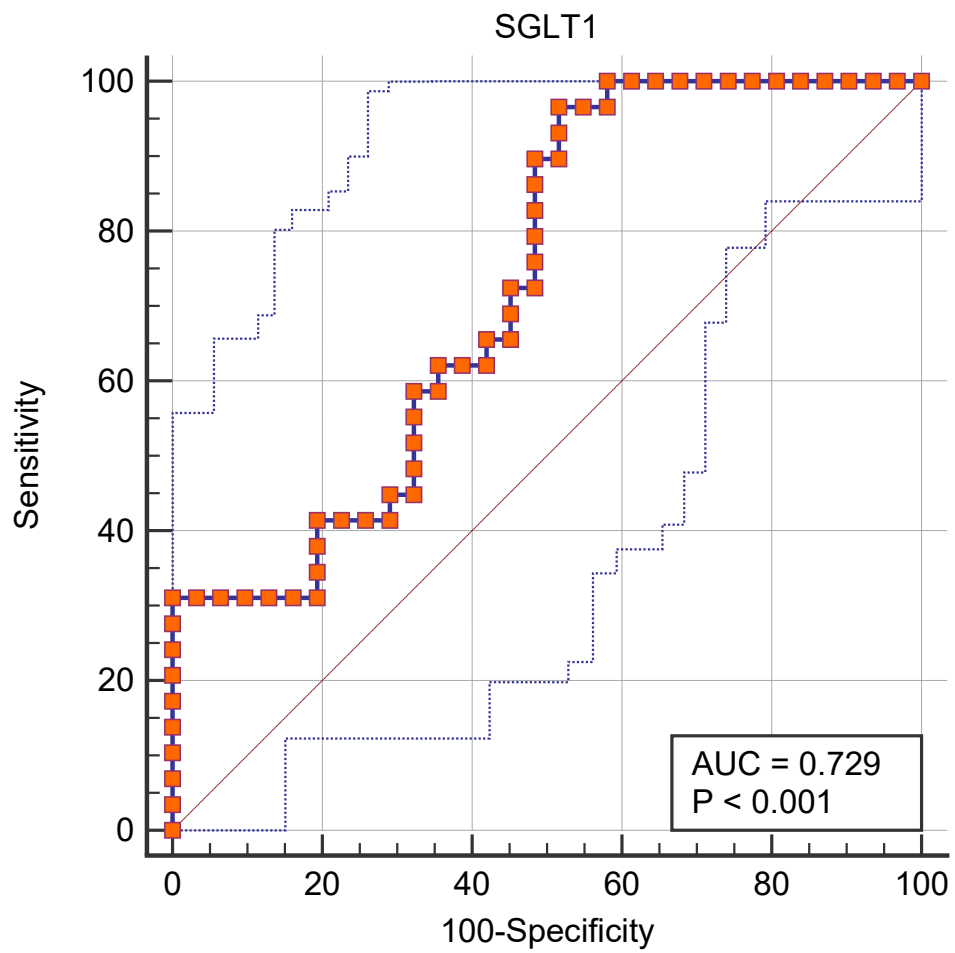

Supplement: RawDataCode_83281.zip [file RawDataCode_83281.zip]

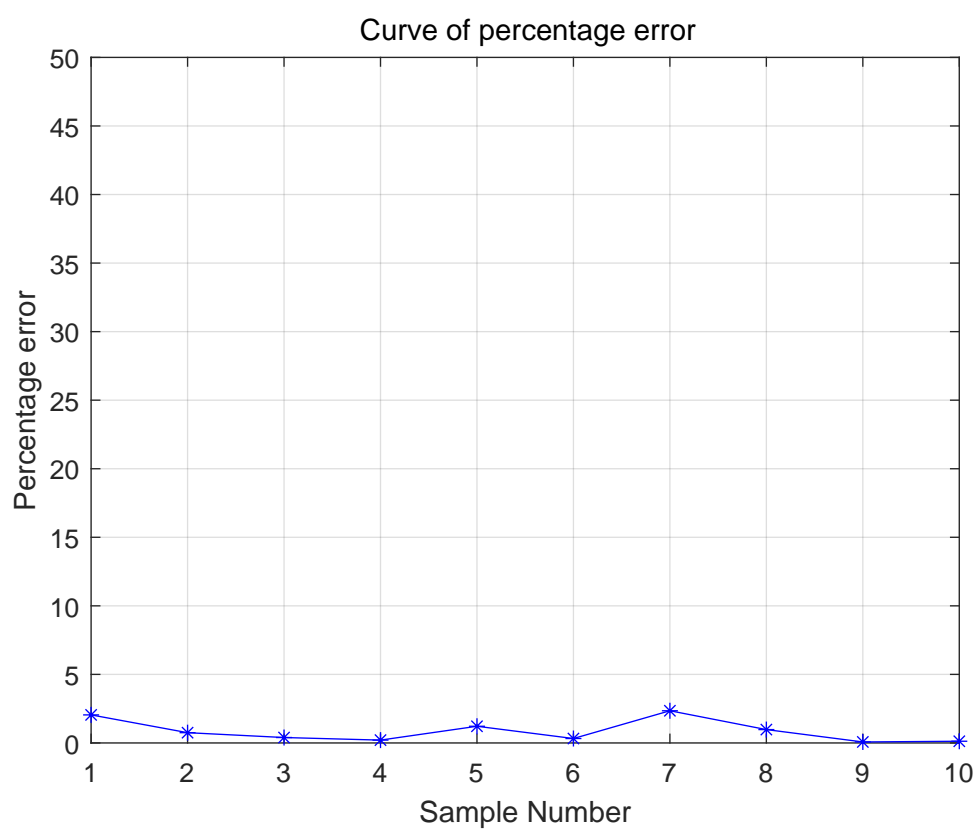

Supplement: RawDataCode_83281.zip [file RawDataCode_83281.zip]

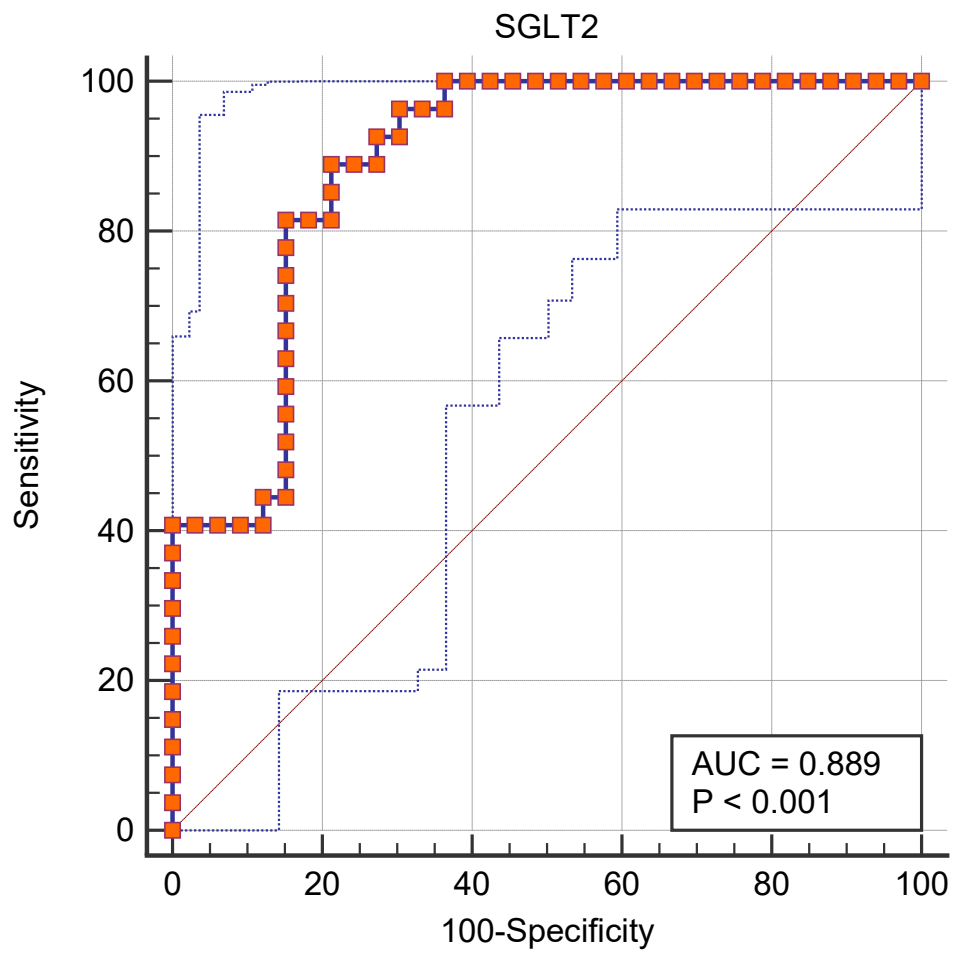

Supplement: RawDataCode_83281.zip [file RawDataCode_83281.zip]

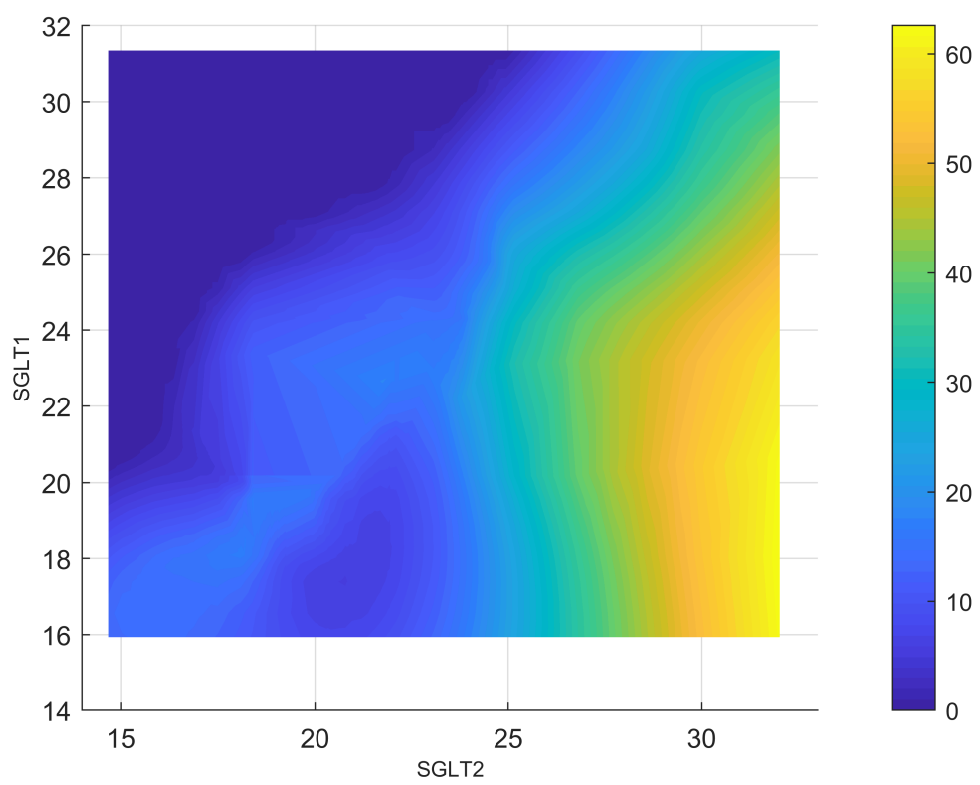

Supplement: RawDataCode_83281.zip [file RawDataCode_83281.zip]

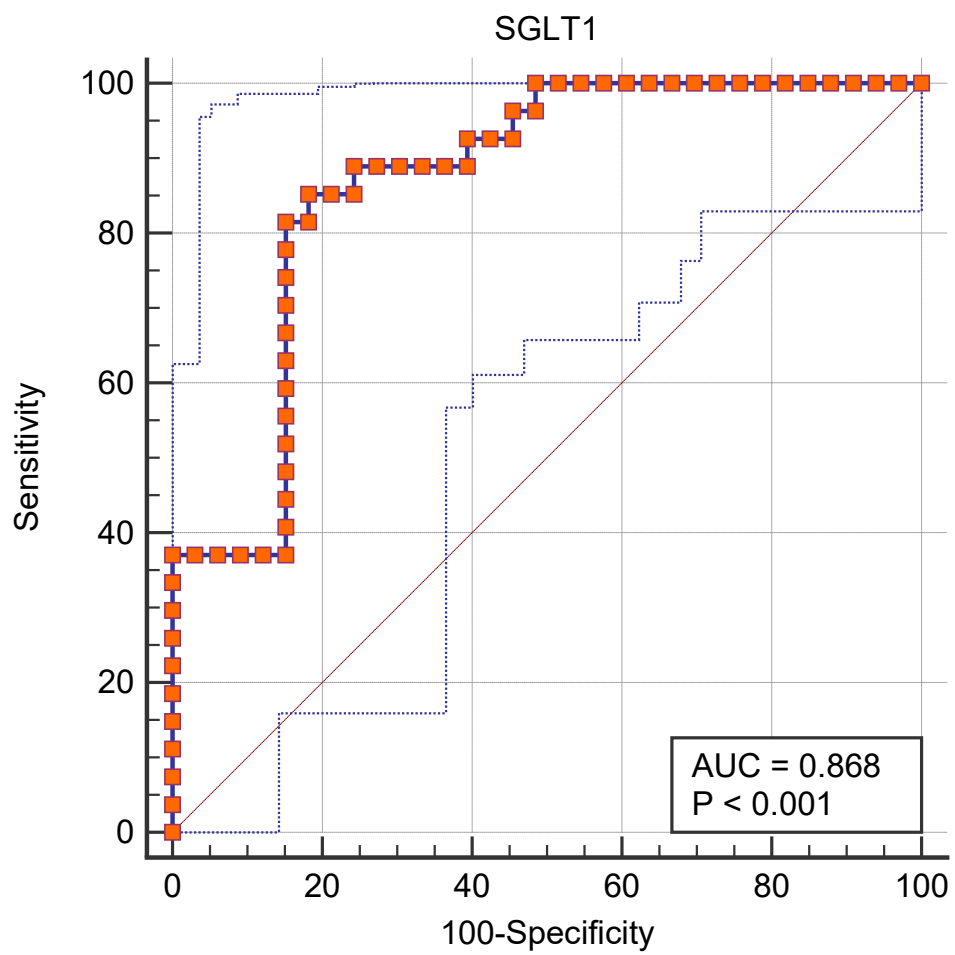

Supplement: RawDataCode_83281.zip [file RawDataCode_83281.zip]

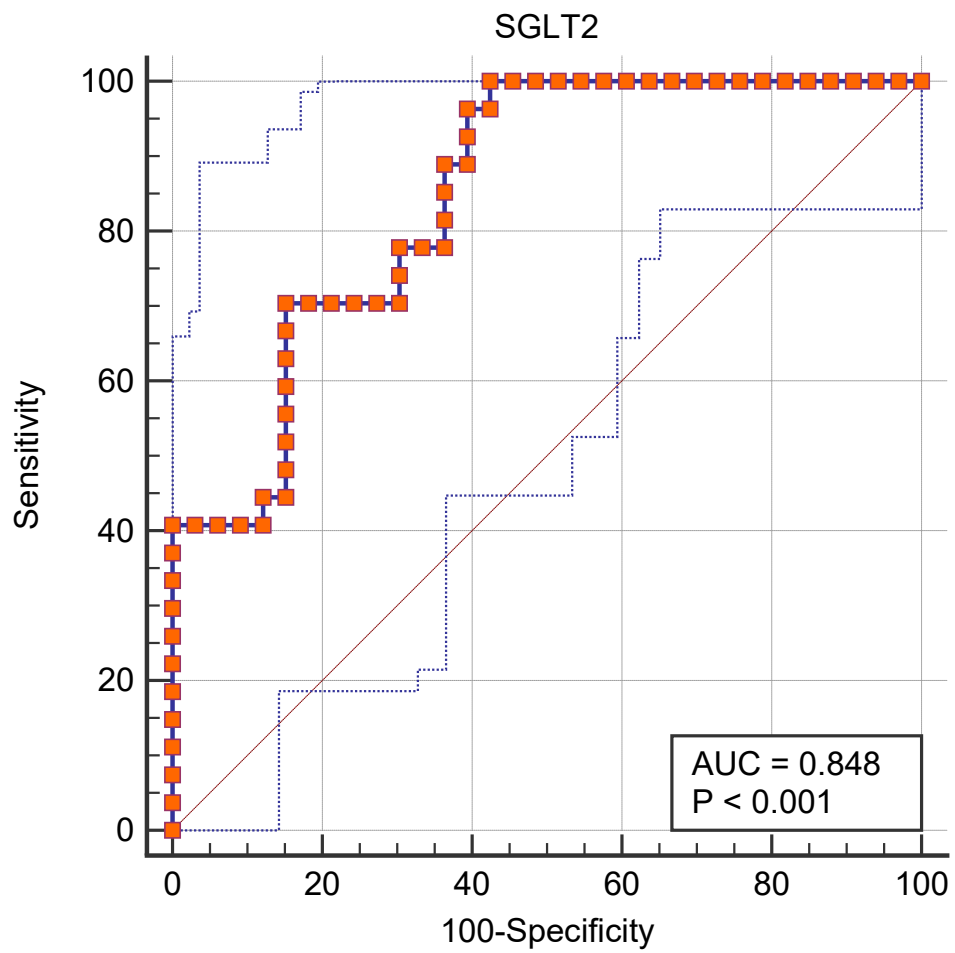

Supplement: RawDataCode_83281.zip [file RawDataCode_83281.zip]

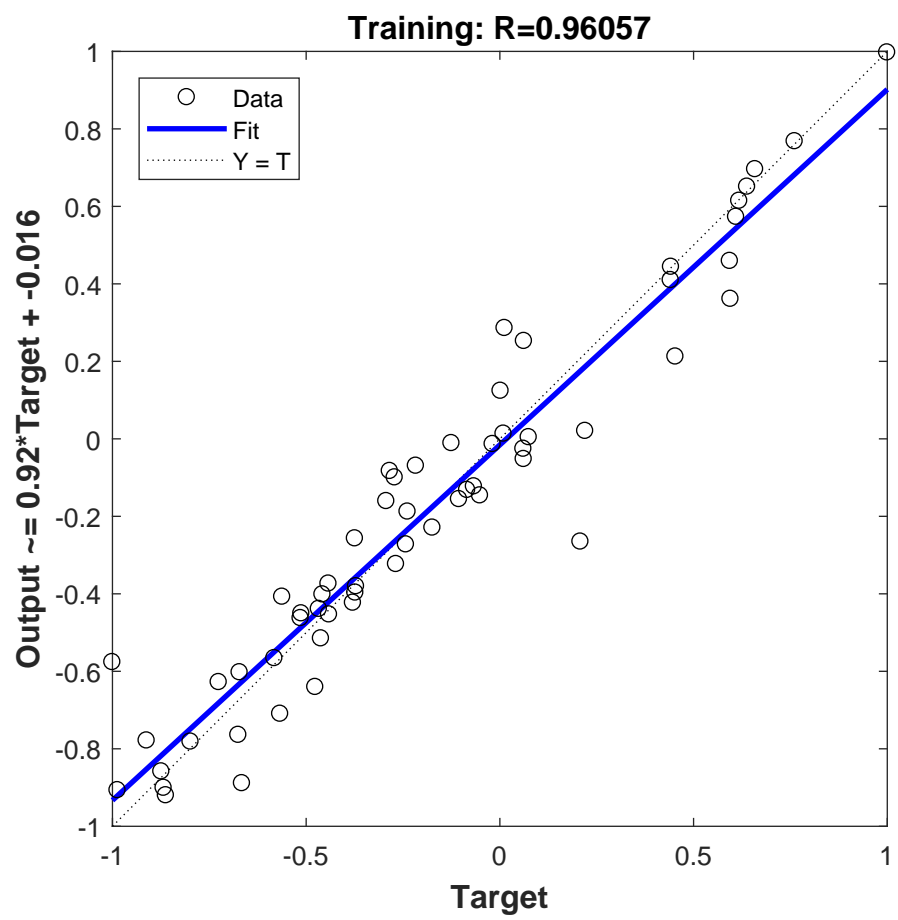

Supplement: RawDataCode_83281.zip [file RawDataCode_83281.zip]

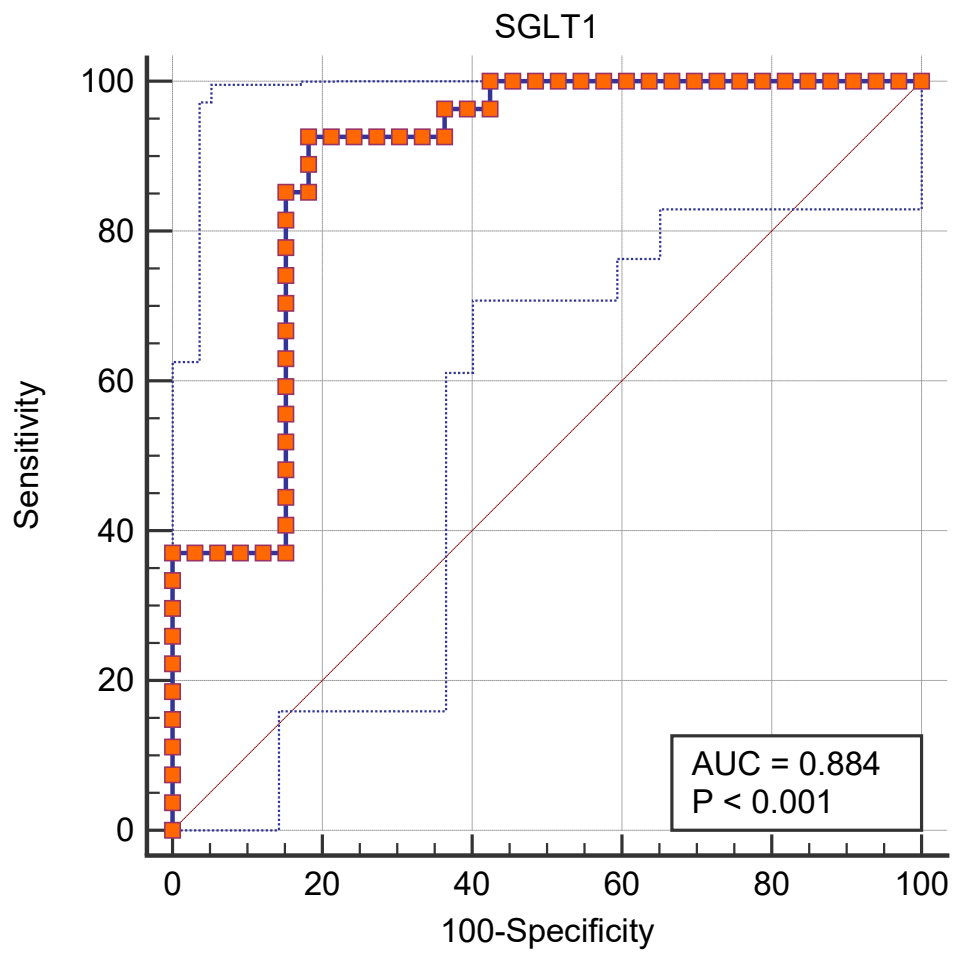

Supplement: RawDataCode_83281.zip [file RawDataCode_83281.zip]

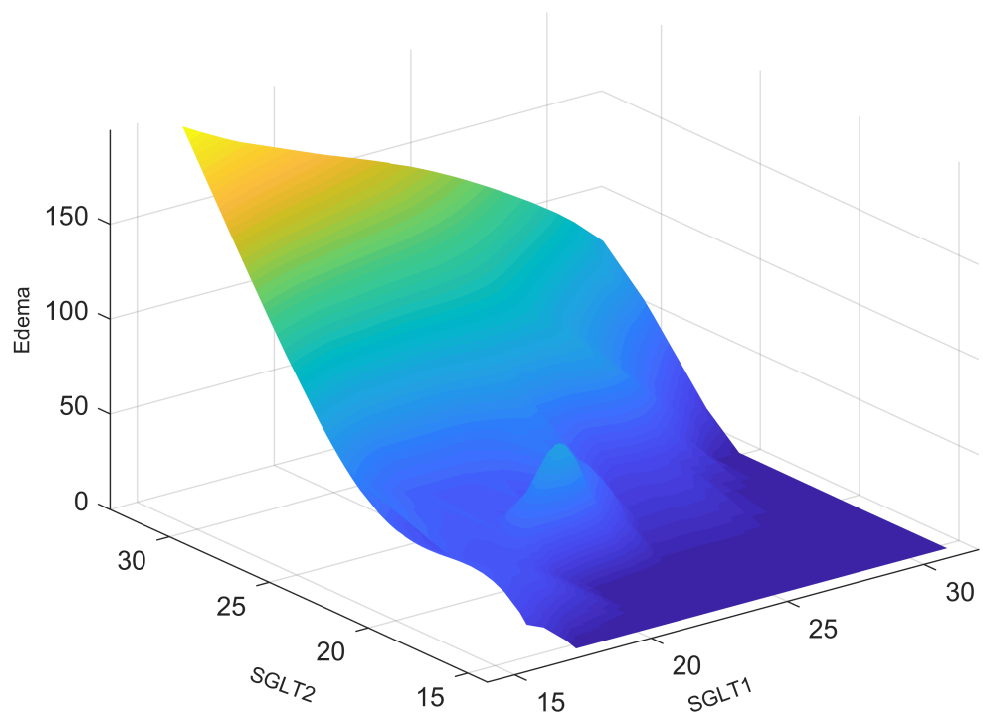

Supplement: RawDataCode_83281.zip [file RawDataCode_83281.zip]

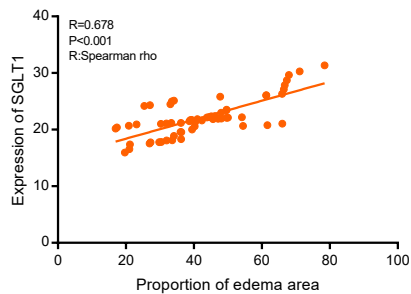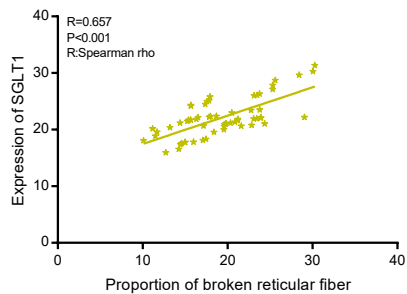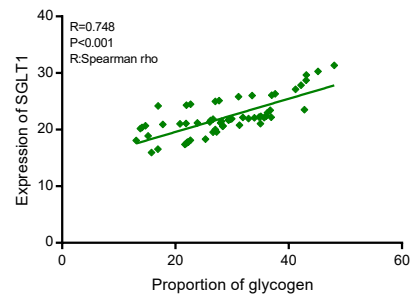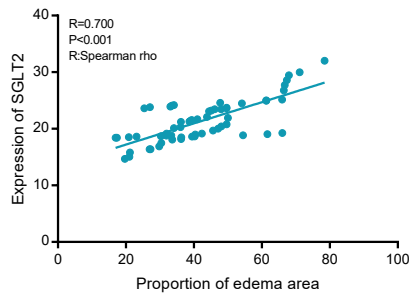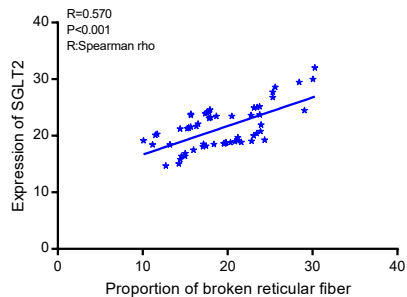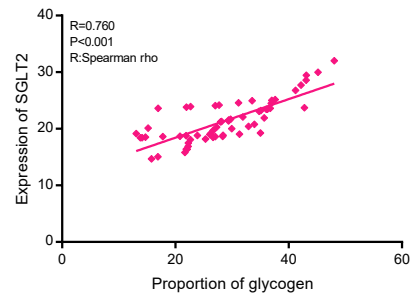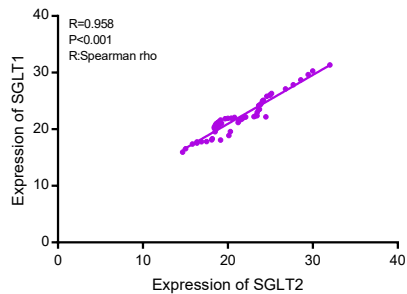

Supplement: RawDataCode_83281.zip [file RawDataCode_83281.zip]

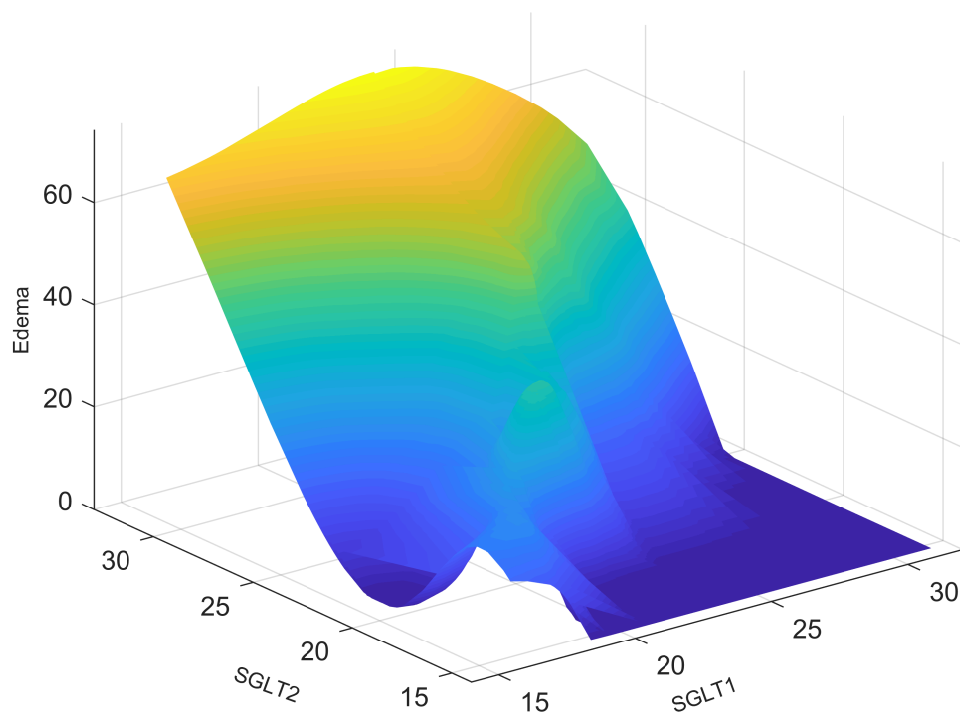

Supplement: RawDataCode_83281.zip [file RawDataCode_83281.zip]

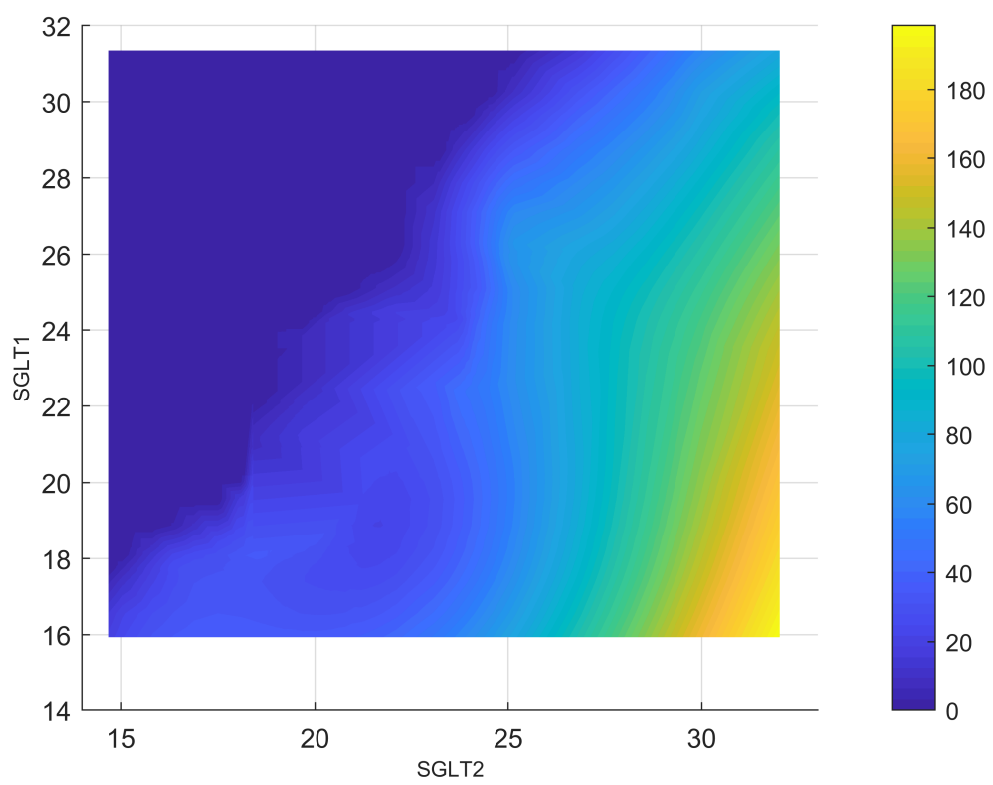

Supplement: RawDataCode_83281.zip [file RawDataCode_83281.zip]

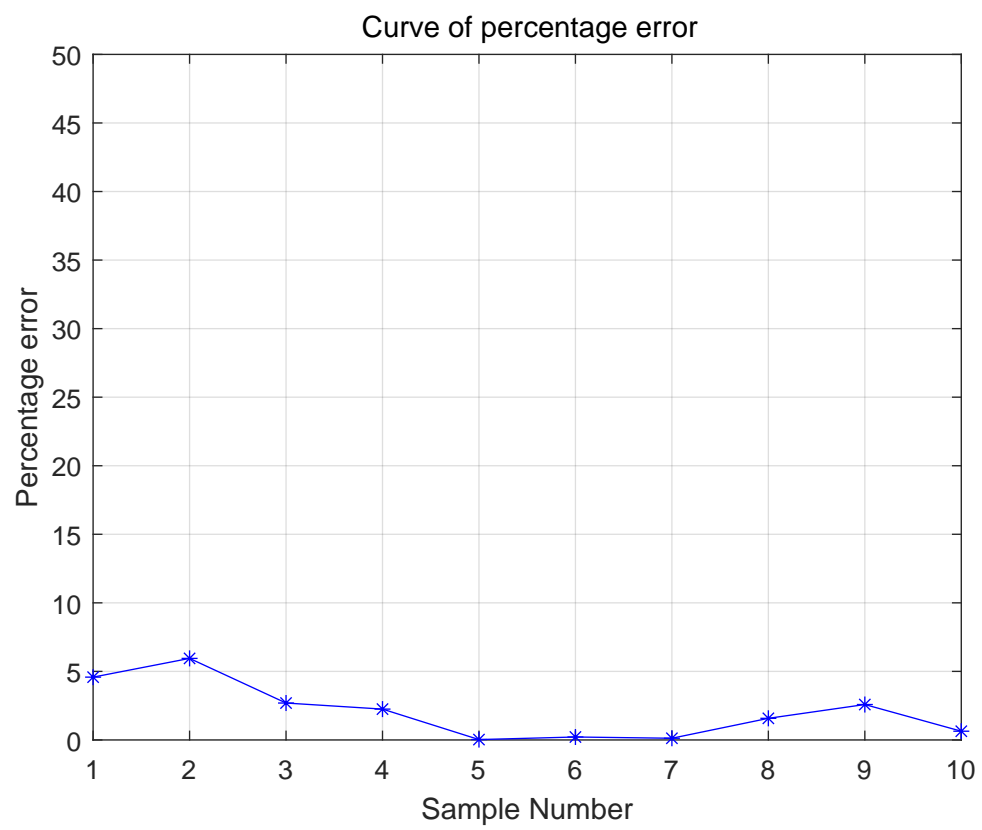

Supplement: RawDataCode_83281.zip [file RawDataCode_83281.zip]

# SGLT2

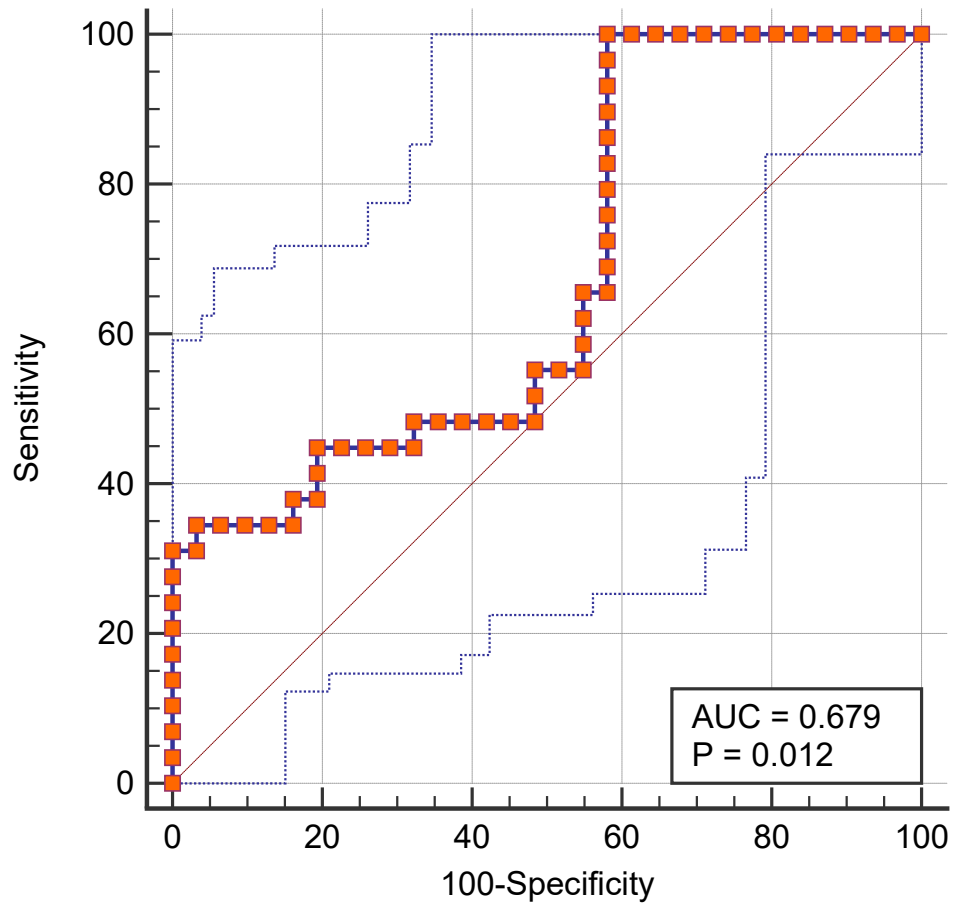

Supplement: RawDataCode_83281.zip [file RawDataCode_83281.zip]

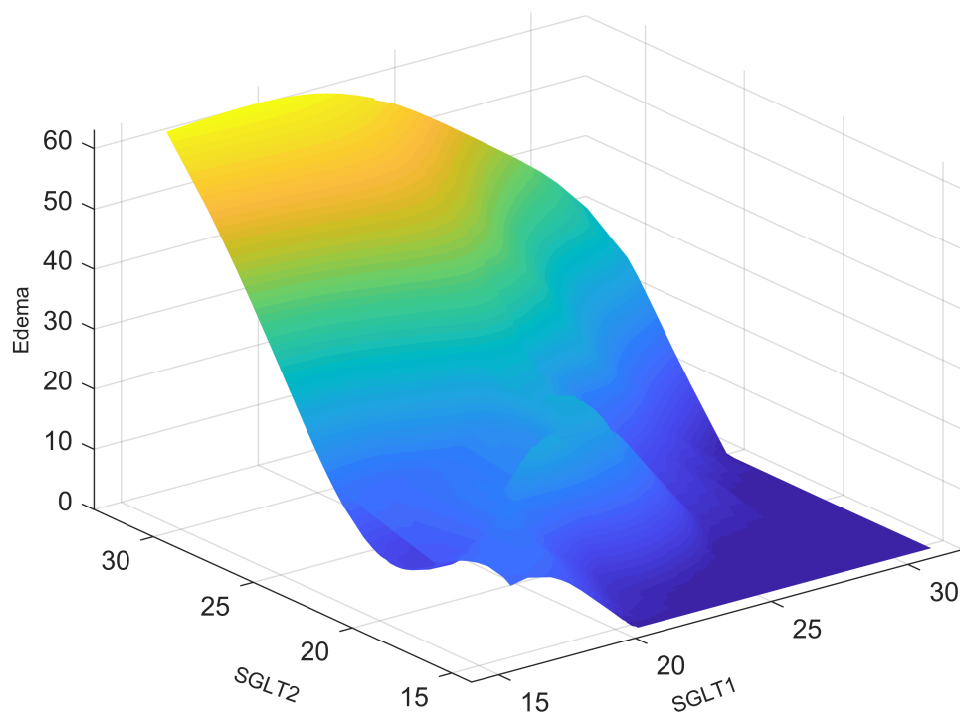

Supplement: RawDataCode_83281.zip [file RawDataCode_83281.zip]

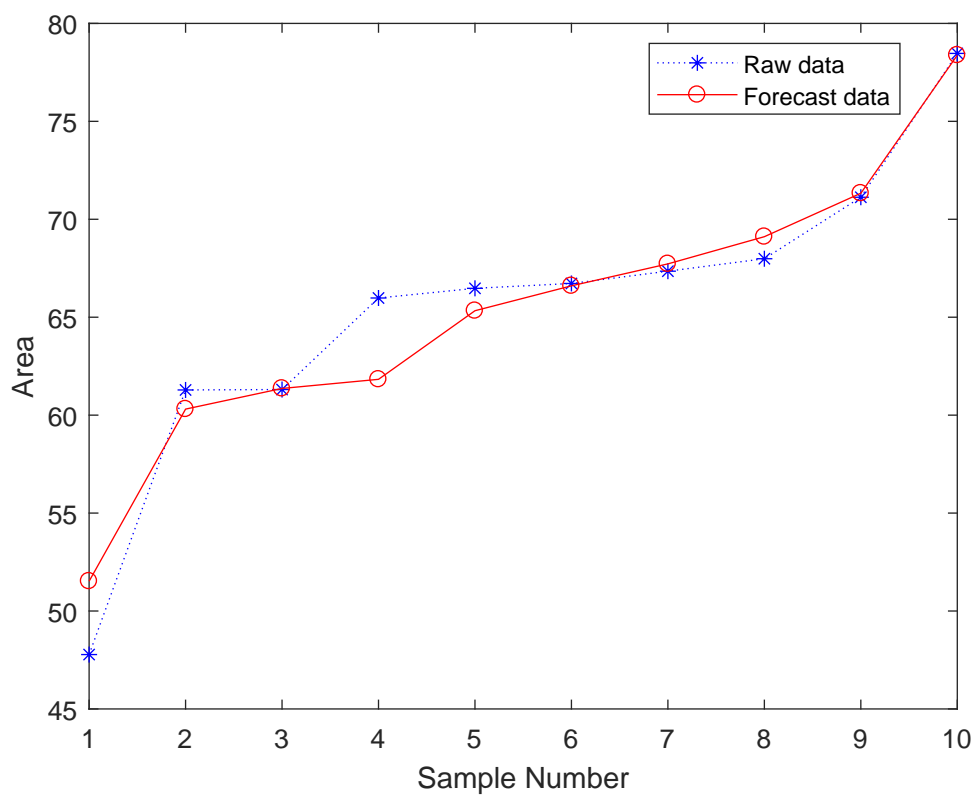

Supplement: RawDataCode_83281.zip [file RawDataCode_83281.zip]

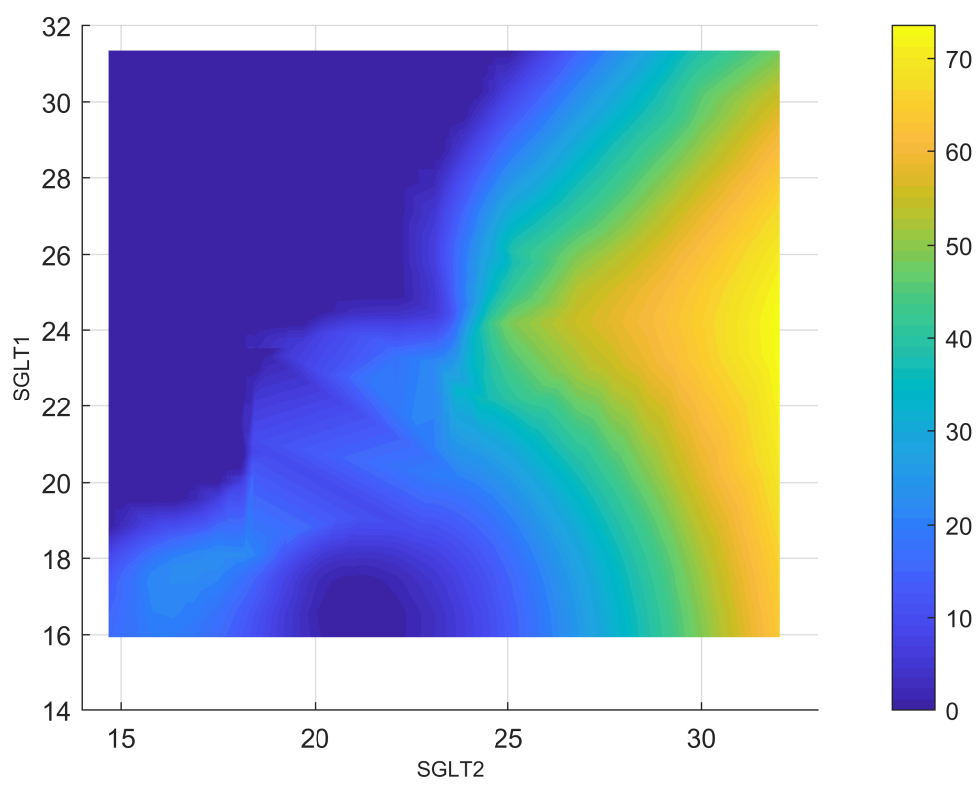

Supplement: RawDataCode_83281.zip [file RawDataCode_83281.zip]

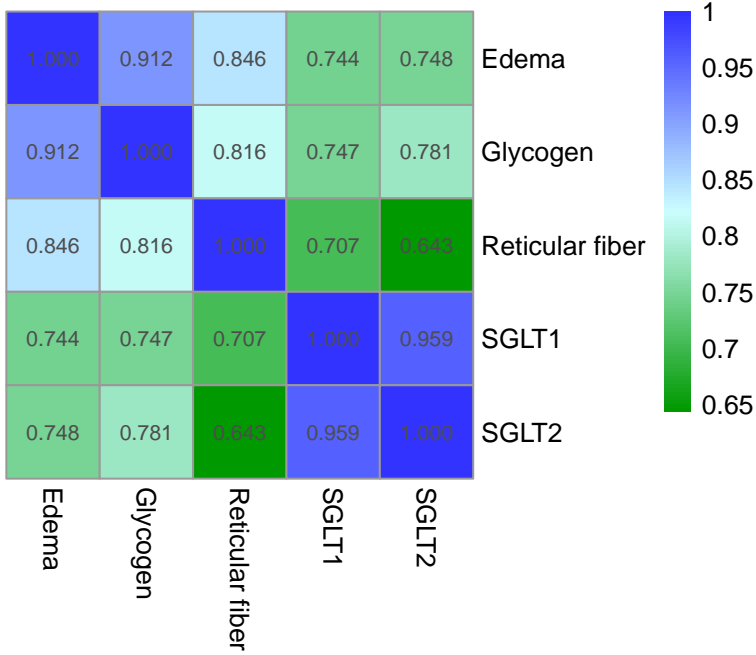

Supplement: RawDataCode_83281.zip [file RawDataCode_83281.zip]

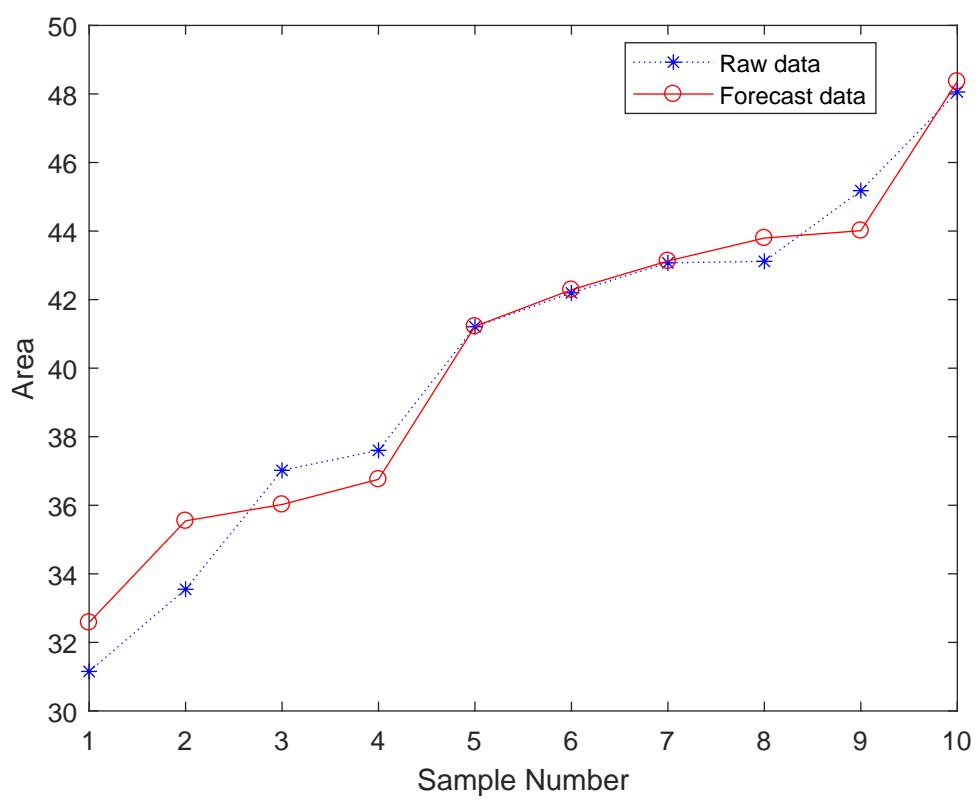

Supplement: RawDataCode_83281.zip [file RawDataCode_83281.zip]

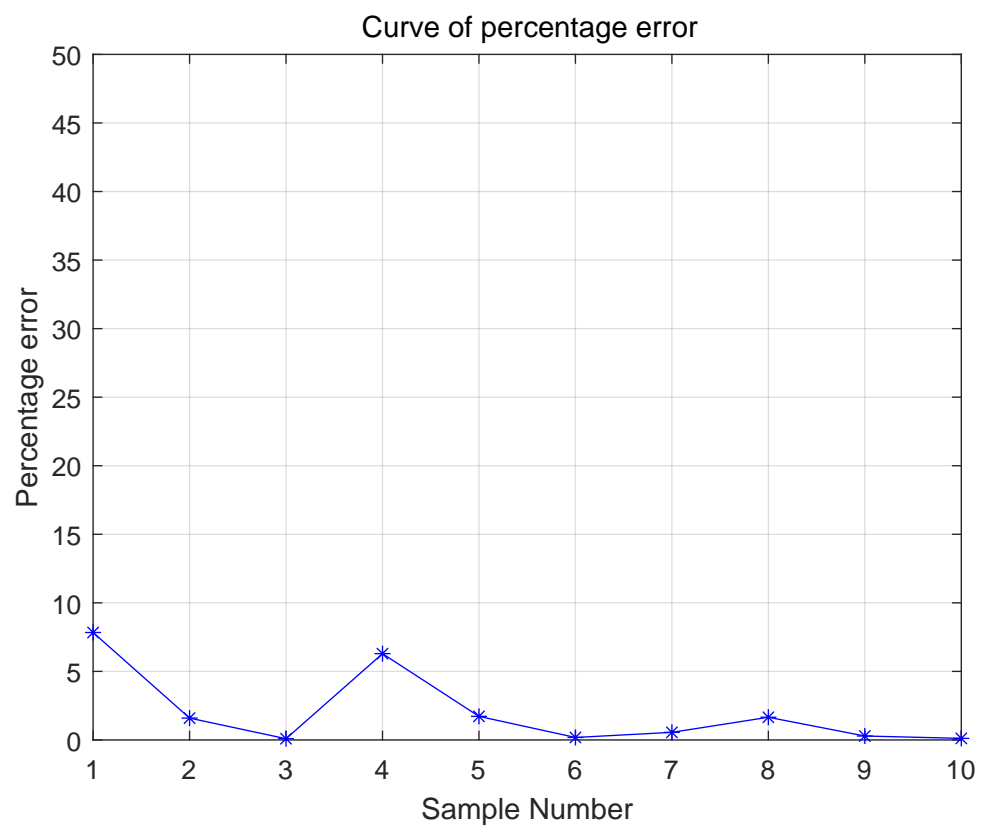

Supplement: RawDataCode_83281.zip [file RawDataCode_83281.zip]

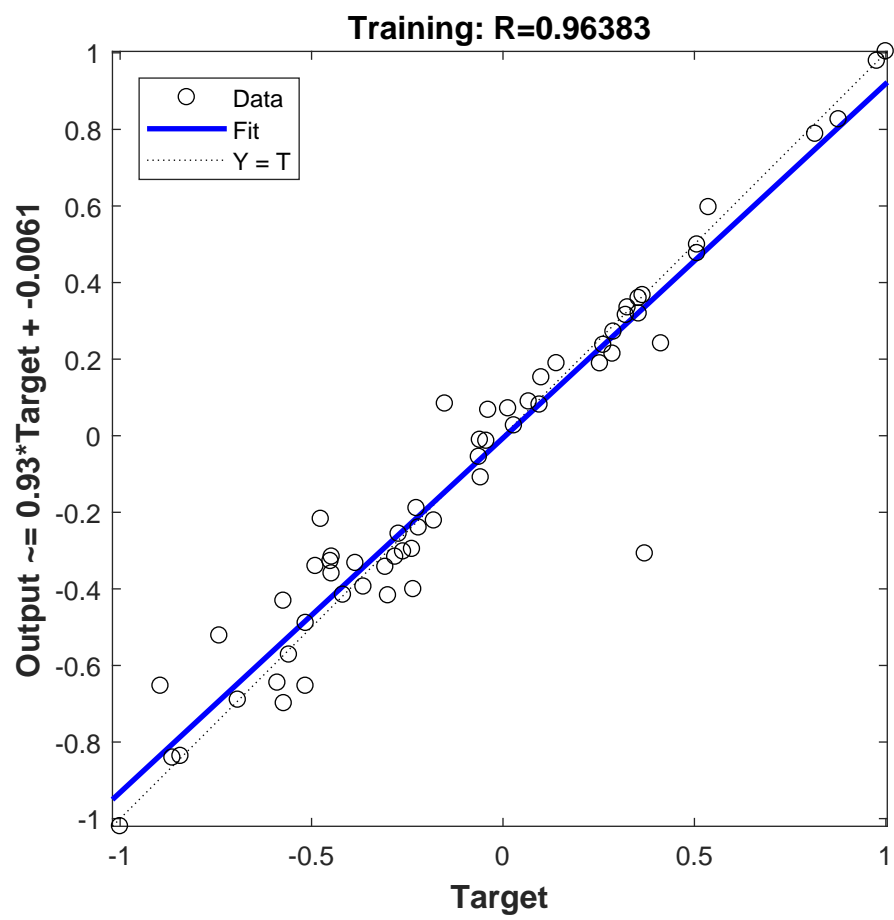

Supplement: RawDataCode_83281.zip [file RawDataCode_83281.zip]

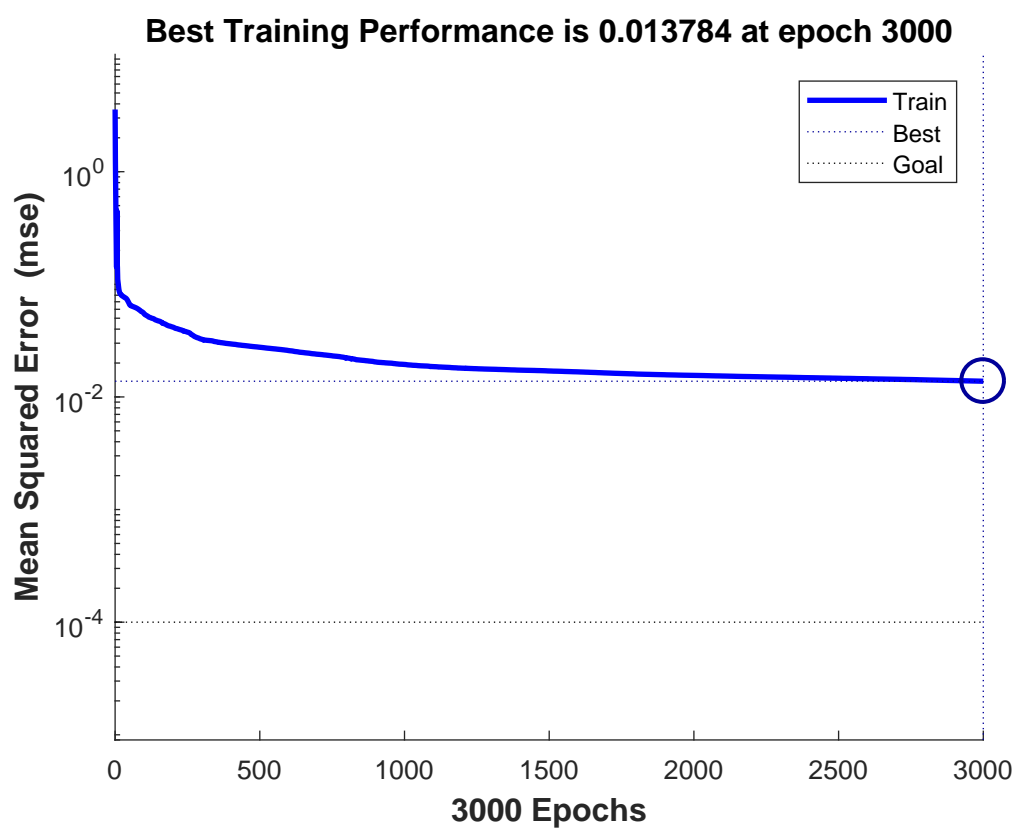

Supplement: RawDataCode_83281.zip [file RawDataCode_83281.zip]

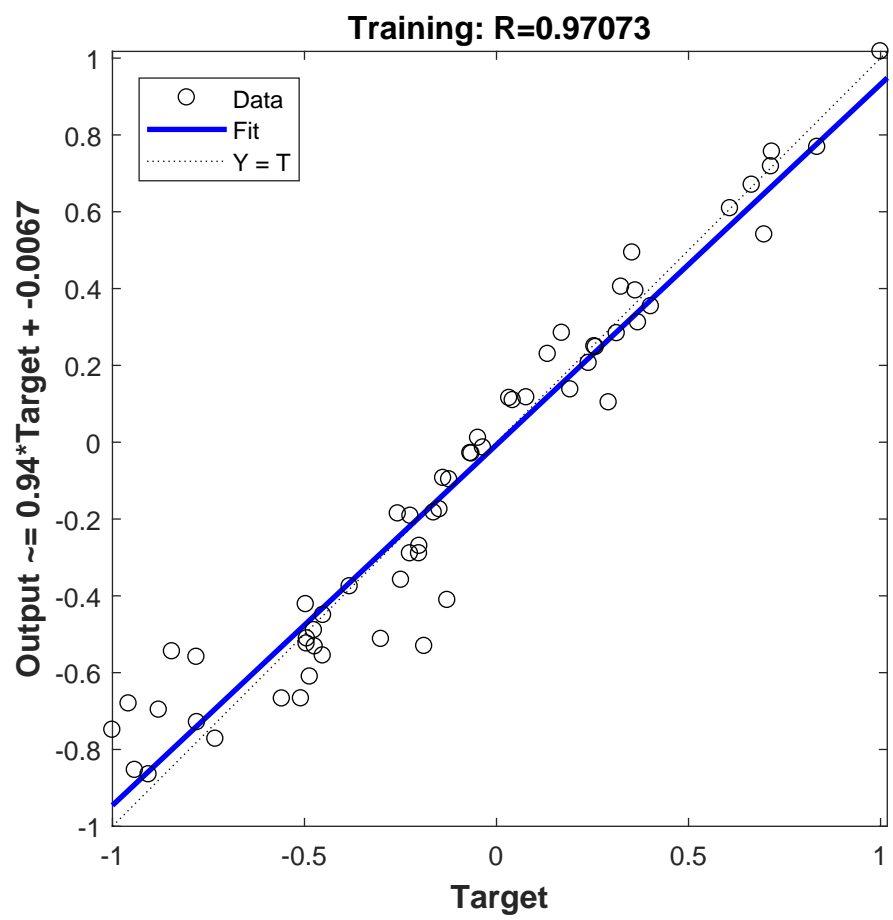

Supplement: RawDataCode_83281.zip [file RawDataCode_83281.zip]
